# Supplementary material for: Feeding Spray-Dried Porcine Plasma to Pigs Improves the Protection Afforded by The African Swine Fever Virus (ASFV) BA71∆CD2 Vaccine Prototype Against Experimental Challenge with The Pandemic ASFV. Study 2.
Source: Preprints.org preprint supplement (doi:10.20944/preprints202301.0564.v1), 2023-01-31
Supplement: Supplementary file 1 [file supplementary]

## Sheet: Blood-NS-RS
Table S2: Individual PCR results (CT values) by day on blood, nasal and rectal swab samples
		DPV	0	7	14	19	25	28	35	41
Treatment	Animal Id	DPE				-2	4	7	14	20	Comments
CONVENTIONAL	C1	BLOOD	>35	>35	30.8275	30.244	>35	>35	>35	26.45
		NASAL SWAB	>35	>35	>35	30.3884	30.8883	26.3016	>35	>35
		RECTAL SWAB	>35	>35	>35	>35	>35	>35	>35	>35
CONVENTIONAL	C2	BLOOD	>35	29.6529	>35	29.371	28.4507	>35	>35	>35
		NASAL SWAB	>35	>35	24.6013	22.5518	27.3329	24.4018	>35	>35
		RECTAL SWAB	>35	>35	>35	>35	>35	>35	>35	>35
CONVENTIONAL	C3	BLOOD	>35	>35	>35	>35	>35	>35	25.1527	16.8586
		NASAL SWAB	>35	>35	>35	>35	26.9212	26.989	29.3027	25.4612
		RECTAL SWAB	>35	>35	>35	>35	>35	>35	>35	28.1668
CONVENTIONAL	C4	BLOOD	>35	>35	>35	>35	>35	>35	21.6966	17.9339
		NASAL SWAB	>35	>35	>35	>35	28.5624	27.624	>35	20.367
		RECTAL SWAB	>35	>35	>35	>35	>35	>35	>35	24.5368
CONVENTIONAL	C5	BLOOD	>35	>35	>35	>35	>35	>35	>35	>35
		NASAL SWAB	>35	>35	>35	25.3877	>35	28.1958	>35	>35
		RECTAL SWAB	>35	>35	>35	>35	>35	>35	>35	>35
CONVENTIONAL	C6	BLOOD	>35	>35	>35	>35	>35	27.5639	10.63		Died on d31pv. Acute meningitis
		NASAL SWAB	>35	>35	>35	30.2614	28.9407	25.351	22.8364
		RECTAL SWAB	>35	>35	29.5049	>35	>35	>35	22.3908
CONVENTIONAL	C7	BLOOD	>35	26.624	>35	>35	>35	>35	25.5065	18.89
		NASAL SWAB	>35	>35	>35	>35	>35	29.5234	>35	>35
		RECTAL SWAB	>35	>35	>35	>35	>35	>35	>35	>35
SDPP	SDPP1	BLOOD	>35	>35	>35	>35	>35	>35	>35		Died on d35pv. Intestinal prolapse
		NASAL SWAB	>35	>35	16.7516	>35	>35	>35	>35
		RECTAL SWAB	>35	>35	>35	>35	>35	>35	>35
SDPP	SDPP2	BLOOD	>35	>35	>35	>35	>35	>35	>35	>35
		NASAL SWAB	>35	>35	>35	>35	>35	>35	>35	>35
		RECTAL SWAB	>35	>35	>35	>35	>35	>35	>35	>35
SDPP	SDPP3	BLOOD	>35	>35	>35	>35	>35	>35	>35	>35
		NASAL SWAB	>35	>35	>35	>35	>35	>35	>35	>35
		RECTAL SWAB	>35	>35	>35	>35	>35	>35	>35	>35
SDPP	SDPP4	BLOOD	>35	>35	>35	>35	>35	>35	>35	>35
		NASAL SWAB	>35	>35	>35	>35	>35	29.45	>35	>35
		RECTAL SWAB	>35	>35	>35	>35	>35	>35	>35	>35
SDPP	SDPP5	BLOOD	>35	>35	>35	>35	>35	>35	>35	>35
		NASAL SWAB	>35	24.3108	>35	>35	>35	28.6917	>35	>35
		RECTAL SWAB	>35	>35	>35	>35	>35	>35	>35	>35
SDPP	SDPP6	BLOOD	>35	>35	>35	>35	>35	>35	>35	>35
		NASAL SWAB	>35	>35	>35	>35	>35	28.857	>35	>35
		RECTAL SWAB	>35	>35	>35	>35	>35	>35	>35	>35
SDPP	SDPP7	BLOOD	>35	>35	>35	>35	>35	>35	>35	>35
		NASAL SWAB	>35	20.6182	>35	>35	>35	27.3306	>35	>35
		RECTAL SWAB	>35	>35	>35	>35	>35	>35	>35	>35
SDPP	SDPP8	BLOOD	>35	>35	30.5485	26.6747					Euthanized to balance groups
		NASAL SWAB	>35	>35	29.6452	27
		RECTAL SWAB	>35	>35	>35	>35
		MEAN	#DIV/0!	22.4645	25.6485	26.8374	#DIV/0!	28.5823	#DIV/0!	#DIV/0!
Means Blood CONVENTIONAL			>35	33.1429	34.4286	33.4286	34	34	27	25
Means Blood SDPP			>35	>35	>35	34	>35	>35	>35	>35
		P value		0.1322	0.9261	0.6966	0.337	0.337	0.0353	0.0151
Means Nasal Swab CONVENTIONAL			>35	>35	33.5714	30.4286	30.4286	26.8571	32.4286	30.8333
Means Nasal Swab SDPP			>35	31.875	32.125	34	>35	31.2857	>35	>35
		P value		0.1824	0.6085	0.1049	0.004	0.0142	0.1751	0.1556
Means Rectal Swab CONVENTIONAL			>35	>35	34.2857	>35	>35	>35	33.1429	32.1667
Means Rectal Swab SDPP group			>35	>35	>35	>35	>35	>35	>35	>35
		P value			0.302				0.337	0.1533
DPV = Days post vaccination; DPE = Days post-exposure
Trojans, individual PCR results (CT values) by day on blood, nasal and rectal swab samples
Treatment	Animal Id	Days of study	0	7	14	19	4dpchll	5dpchll	6dpchll	7dpchll	8dpchll	Comments
TROJANS CONVENTIONAL	T1-C	BLOOD	>35	>35	>35	>35	28.5972			24.6662	22.3028	Euthanasia at 8dpi
		NASAL SWAB	>35	>35	>35	>35	28.9112			24.1998	20.7473
		RECTAL SWAB	>35	>35	>35	>35	>35			>35	>35
TROJANS CONVENTIONAL	T2-C	BLOOD	>35	>35	>35	>35	9.62935					Euthanasia at 4dpi
		NASAL SWAB	>35	>35	>35	>35	19.5702
		RECTAL SWAB	>35	>35	>35	>35	21.181
TROJANS CONVENTIONAL	T3-C	BLOOD	>35	>35	>35	>35	10.0916	9.20269				Euthanasia at 5 dpi
		NASAL SWAB	>35	>35	>35	>35	21.2187	16.3869
		RECTAL SWAB	>35	>35	>35	>35	22.4249	22.288
TROJANS CONVENTIONAL	T4-C	BLOOD	>35	>35	>35	>35	9.68382			10.0229		Euthanasia al 7 dpi
		NASAL SWAB	>35	>35	>35	>35	17.8603			13.053
		RECTAL SWAB	>35	>35	>35	>35	20.3183			15.4662
TROJANS SDPP	T5-SDPP	BLOOD	>35	>35	>35	>35	9.63154		8.80109			Euthanasia at 6dpi
		NASAL SWAB	>35	>35	>35	>35	25.0115		15.2295
		RECTAL SWAB	>35	>35	>35	>35	22.9625		23.0513
TROJANS SDPP	T6-SDPP	BLOOD	>35	>35	>35	>35	17.9642		7.22798			Euthanasia at 7dpi
		NASAL SWAB	>35	>35	>35	>35	>35		17.6648
		RECTAL SWAB	>35	>35	>35	>35	>35		16.6555
TROJANS SDPP	T7-SDPP	BLOOD	>35	>35	>35	>35	19.844			14.7704	14.6692	Euthanasia at 8dpi
		NASAL SWAB	>35	>35	>35	>35	>35			25.7923	26.3267
		RECTAL SWAB	>35	>35	>35	>35	>35			26.5277	23.3116
TROJANS SDPP	T8-SDPP	BLOOD	>35	>35	>35	>35	18.9939		9.61909			Euthanasia at 7dpi
		NASAL SWAB	>35	>35	>35	>35	>35		15.587
		RECTAL SWAB	>35	>35	>35	>35	>35		16.7348
Means Blood Trojans CONVENTIONAL			>35	>35	>35	>35	14.5005	9.20269		17.3445	22.3028
Means Blood Trojans SDPP			>35	>35	>35	>35	16.6084		8.54939	14.7704	14.6692
Means Nasal Swab Trojans CONVENTIONAL			>35	>35	>35	>35	21.8901	16.3869		18.6264	20.7473
Means Nasal Swab Trojans SDPP			>35	>35	>35	>35	25.0115		16.1604	25.7923	26.3267
Means Rectal Swab Trojans CONVENTIONAL			>35	>35	>35	>35	21.3081	22.288		15.4662	>35
Means Rectal Swab Trojans SDPP			>35	>35	>35	>35	22.9625		18.8138	26.5277	23.3116
