# Supplementary material for: Feeding Spray-Dried Porcine Plasma to Pigs Improves the Protection Afforded by The African Swine Fever Virus (ASFV) BA71∆CD2 Vaccine Prototype Against Experimental Challenge with The Pandemic ASFV. Study 2.
Source: Preprints.org preprint supplement (doi:10.20944/preprints202301.0564.v1), 2023-01-31
Supplement: Supplementary file 2 [file Table S1- Rectal temperature evolution - Study 2-V1.xlsx]

## Sheet: Temperature
Table S1: Rectal temperature throuhgout the duration of the study. Values expresed in ºC
Day		2021-09-09	2021-09-10	2021-09-11	2021-09-12	2021-09-13	2021-09-14	2021-09-15	2021-09-16	2021-09-17	2021-09-18	2021-09-19	2021-09-20	2021-09-21	2021-09-22	2021-09-23	2021-09-24	2021-09-25	2021-09-26	2021-09-27	2021-09-28	2021-09-29	2021-09-30	2021-10-01	2021-10-02	2021-10-03	2021-10-04	2021-10-05	2021-10-06	2021-10-07	2021-10-08	2021-10-09	2021-10-10	2021-10-11	2021-10-12	2021-10-13	2021-10-14	2021-10-15	2021-10-16	2021-10-17	2021-10-18	2021-10-19	2021-10-20
Days post vaccination		D0	D1	D2	D3	D4	D5	D6	D7	D8	D9	D10	D11	D12	D13	D14	D15	D16	D17	D18	D19	D20	D21	D22	D23	D24	D25	D26	D27	D28	D29	D30	D31	D32	D33	D34	D35	D36	D37	D38	D39	D40	D41
Treatment	Nº Animal
CONVENTIONAL	C1	39.66	39.92	39.99	39.9	39.55	39.79	39.98	39.67	39.71	39.83	39.75	39.88	39.83	39.76	39.72	39.94	39.99	40	40.12	40.22	39.85	39.68	39.61	39.78	39.72	39.64	39.7	39.48	39.8	39.66	39.53	39.88	39.92	39.88	39.68	39.68	39.76	40.08	40.06	40.04	40.04	39.74
CONVENTIONAL	C2	39.6	39.76	39.9	39.73	39.67	39.95	40.06	39.69	39.66	39.88	40.34	40.13	40.16	40.17	39.9	39.85	39.97	40.14	39.83	40.24	40.2	39.86	40.02	39.92	40.14	39.86	40.11	39.86	40.26	40.02	39.85	40.4	40.24	39.66	39.58	39.72	39.55	39.53	39.74	39.85	39.85	39.47
CONVENTIONAL	C3	39.72	39.53	39.6	39.65	39.55	39.6	39.95	39.55	39.9	39.49	39.88	39.81	39.73	39.68	39.7	39.66	39.68	39.76	39.78	39.7	39.48	39.98	39.59	39.72	39.44	39.78	39.59	39.38	39.42	39.68	39.3	39.38	39.32	39.38	39.42	40.7	41.26	41.8	41.55	40.86	40.86	39.4
CONVENTIONAL	C4	39.74	39.74	39.71	39.65	39.65	39.73	39.93	39.6	39.49	39.53	39.77	39.93	39.9	39.55	39.6	39.64	39.6	39.48	39.9	39.46	39.62	39.62	39.23	39.26	39.38	39.21	39.48	39.23	39.76	39.33	39.34	39.44	39.46	39.53	39.05	40.14	40.5	41.28	41.38	41.66	41.66	41.6
CONVENTIONAL	C5	39.25	39.6	39.4	39.21	39.35	39.71	40.2	39.52	39.63	39.66	39.67	39.3	39.9	40.08	39.48	39.72	39.72	39.6	39.53	39.66	39.74	39.86	39.66	39.14	39.42	39.42	39.61	39.2	39.3	39.36	39.34	39.49	39.88	39.72	39.46	38.92	39.14	39.38	39.32	39.55	39.55	39.85
CONVENTIONAL	C6	39.8	39.7	39.36	39.3	39.93	39.73	39.98	39.88	39.99	39.69	40.27	39.75	39.81	39.74	39.55	39.84	39.62	39.94	39.74	39.76	39.46	39.46	39.74	39.64	39.64	39.69	39.75	39.74	39.5	40.51	41.15	39.88
CONVENTIONAL	C7	39.8	39.83	39.4	39.49	39.47	39.76	39.79	40.25	39.95	39.77	39.71	39.93	39.58	39.68	39.83	39.92	39.74	40.08	39.88	39.85	39.8	39.54	39.38	39.5	39.5	39.59	39.72	39.54	39.36	39.46	39.78	39.5	39.48	39.46	39.62	40.62	39.76	39.76	39.94	39.9	39.9	39.72
SDPP	SDPP1	39.73	39.29	39.49	39.96	39.98	40.19	39.96	39.55	39.55	39.55	40.13	39.89	39.98	39.98	40.28	39.96	40.26	40.37	40.11	40.07	39.87	40.17	39.96	39.96	40.17	39.87	40.13	40.09	39.65	39.69	39.73	39.67	39.87	39.67	39.75
SDPP	SDPP2	39.87	39.11	39.81	40.42	39.85	39.75	39.96	39.38	39.71	39.71	39.77	39.79	39.67	40.11	39.96	39.98	39.89	40.25	39.98	39.73	39.96	39.93	40.28	39.87	39.98	39.77	39.96	39.89	40.32	39.65	40.09	40.03	39.77	39.63	39.87	39.96	39.79	39.78	39.82	39.8	39.78	39.81
SDPP	SDPP3	39.73	39.33	39.91	39.76	40.07	39.71	39.67	39.65	39.67	39.85	39.71	39.55	39.67	39.63	39.65	39.71	39.67	39.65	39.56	39.65	39.63	39.73	39.89	39.63	39.71	39.41	39.55	39.27	39.44	39.69	39.31	39.25	39.33	39.41	39.27	39.25	39.36	39.55	39.52	39.55	39.42	39.4
SDPP	SDPP4	39.73	39.43	39.96	39.65	39.99	39.89	39.59	39.67	39.63	39.81	40.13	40.34	39.87	39.65	40.17	39.65	39.55	40.15	39.83	39.99	39.57	39.77	39.41	39.81	39.71	39.21	39.31	39.95	39.41	39.61	39.69	39.43	39.43	39.21	39.59	39.57	39.41	39.25	39.5	39.21	39.45	39.36
SDPP	SDPP5	39.61	39.58	39.55	39.81	39.71	40.05	39.73	40.58	39.46	39.71	39.81	39.25	39.65	39.63	39.9	39.62	39.27	39.48	39.71	39.33	39.99	39.77	39.23	39.43	39.55	39.43	39.38	39.29	39.38	39.31	39.23	39.29	39.61	39.47	39.31	39.27	39.59	39.34	39.47	39.27	39.4	39.53
SDPP	SDPP6	39.81	39.13	39.81	40.07	40.37	41.37	40.25	41.06	39.75	40.43	40.05	39.98	40.11	41.41	40.21	40.08	40.53	40.47	39.96	40.31	40.17	40.71	40.51	40.47	40.11	40.05	39.93	39.93	39.89	40.01	39.73	39.75	39.81	39.81	39.77	39.67	39.91	40.1	39.7	39.57	39.78	39.7
SDPP	SDPP7	39.65	39.27	39.36	39.61	39.89	40.25	40.09	40.88	39.48	39.93	39.57	40.26	39.6	39.81	39.63	39.39	39.63	39.87	39.73	39.37	39.51	39.89	39.55	39.43	39.46	39.65	39.81	39.69	39.43	39.61	39.91	39.38	39.75	39.46	39.57	39.38	39.63	39.74	39.3	39.76	39.52	39.69
SDPP	SDPP8	39.77	39.46	39.85	39.84	39.71	39.39	39.79	39.67	39.79	39.69	39.69	39.81	39.89	40.25	40.28	40.4	40.4	41.45	40.4	40.59	40.4	40.17
	Means CONVENTIONAL	39.6529	39.7257	39.6229	39.5614	39.5957	39.7529	39.9843	39.7371	39.7614	39.6929	39.9129	39.8186	39.8443	39.8086	39.6829	39.7957	39.76	39.8571	39.8257	39.8414	39.7357	39.7143	39.6043	39.5657	39.6057	39.5986	39.7086	39.49	39.6286	39.7171	39.7557	39.71	39.7167	39.605	39.4683	39.9633	39.995	40.305	40.3317	40.31	40.31	39.9633
	Means SDPP	39.7375	39.325	39.7175	39.89	39.9462	40.075	39.88	40.055	39.63	39.835	39.8575	39.8588	39.805	40.0588	40.01	39.8487	39.9	40.2112	39.91	39.88	39.8875	40.0175	39.8329	39.8	39.8129	39.6271	39.7243	39.73	39.6457	39.6529	39.67	39.5429	39.6529	39.5229	39.59	39.5167	39.615	39.6267	39.5517	39.5267	39.5583	39.5817
	P value	0.2757	0.0002	0.453	0.0264	0.0049	0.1818	0.2968	0.2596	0.1277	0.2328	0.6707	0.8085	0.6824	0.3149	0.0135	0.6859	0.4506	0.1761	0.4892	0.8478	0.3222	0.0518	0.2761	0.2014	0.1785	0.8407	0.9128	0.1488	0.9271	0.7232	0.7586	0.3597	0.6915	0.4562	0.3595	0.1606	0.266	0.1436	0.0677	0.0436	0.0472	0.2915
TROJANS CONVENTIONAL	T1-C	39.74	39.99	39.97	39.76	39.6	39.9	39.68	39.66	39.5	39.58	39.66	39.94	39.76	39.46	39.29	39.38	39.38	39.2	39.64	39.59	39.68	39.52	39.66	39.99	40.74	40.42	41.1	41.72	40.35	40.66
TROJANS CONVENTIONAL	T2-C	39.5	39.72	39.72	39.42	39.55	39.9	39.64	39.85	39.72	39.6	39.7	39.98	39.78	39.64	39.67	39.5	39.89	39.42	39.54	39.46	39.5	39.2	39.59	41.38	41.06	42
TROJANS CONVENTIONAL	T3-C	40.15	39.91	39.78	39.94	39.94	40.14	39.97	39.85	39.68	39.74	39.68	39.68	39.53	39.72	39.68	39.68	39.88	39.61	39.84	39.98	39.7	39.59	39.68	40.28	41.49	41.04	39.69
TROJANS CONVENTIONAL	T4-C	38.84	39.55	38.71	39.83	39.88	39.64	39.25	39.58	39.55	39.8	40.08	39.96	39.62	39.72	39.8	40.14	39.91	39.81	39.86	39.82	39.68	39.7	39.64	40.84	40.61	41.32	41.96	41.28	41.72
TROJANS SDPP	T4-SDPP	39.65	39.7	39.74	39.7	39.99	39.98	39.72	40.1	39.72	39.9	39.84	39.82	39.91	39.79	39.65	39.82	39.57	39.48	39.72	39.9	39.81	39.83	39.91	39.85	41.43	41.97	41.56	42
TROJANS SDDP	T5-SDPP	39.88	39.9	39.92	39.65	39.84	39.92	39.78	39.99	39.99	40.54	39.86	39.7	39.94	39.86	39.76	39.82	39.7	40	40.24	39.82	40.37	39.91	39.81	39.99	40.25	40.4	41.99	42	41.47
TROJANS SDDP	T6-SDPP	39.84	39.69	39.7	39.62	39.57	39.6	39.79	40.1	39.94	39.52	39.94	39.7	40.1	39.88	40.22	39.88	40.59	39.96	40.2	40.34	39.81	40.1	40.11	39.83	39.99	39.87	41.71	41.79	40.93	41.56
TROJANS SDDP	T7-SDPP	39.74	39.36	39.3	39.32	39.55	39.72	39.5	39.65	39.73	39.67	39.88	39.88	39.7	39.74	39.7	39.86	39.6	39.84	39.84	39.94	39.85	39.85	39.69	39.79	39.89	39.87	40.95	41.64	42
Means Trojans CONVENTIONAL		39.5575	39.7925	39.545	39.7375	39.7425	39.895	39.635	39.735	39.6125	39.68	39.78	39.89	39.6725	39.635	39.61	39.675	39.765	39.51	39.72	39.7125	39.64	39.5025	39.6425	40.6225	40.975	41.195	40.9167	41.5	41.035	40.66
Means Trojans SDPP		39.7775	39.6625	39.665	39.5725	39.7375	39.805	39.6975	39.96	39.845	39.9075	39.88	39.775	39.9125	39.8175	39.8325	39.845	39.865	39.82	40	40	39.96	39.9225	39.88	39.865	40.39	40.5275	41.5525	41.8575	41.4667	41.56
