# Supplementary material for: Feeding Spray-Dried Porcine Plasma to Pigs Improves the Protection Afforded by The African Swine Fever Virus (ASFV) BA71∆CD2 Vaccine Prototype Against Experimental Challenge with The Pandemic ASFV. Study 2.
Source: Preprints.org preprint supplement (doi:10.20944/preprints202301.0564.v1), 2023-01-31
Supplement: Supplementary file 4 [file Table S3- Tissues PCR values at necropsia - Study 2-V1.xlsx]

## Sheet: Tissues
Table S3: Individual PCR results (CT values) on different tissues at the time of sacrifice
Treatments	Animal Id	LN submax	LN retrofar	LN Gastro-Hepat	Spreen	Tonsil	Incidences
CONVENTIONAL	C1	21.5451	>35	>35	26.4545	26.6156
CONVENTIONAL	C2	>35	>35	>35	>35	26.9916
CONVENTIONAL	C3	22.9859	21.7273	22.2184	16.4153	19.9724
CONVENTIONAL	C4	15.6055	15.362	21.3335	18.0954	16.9059
CONVENTIONAL	C5	>35	>35	>35	>35	>35
CONVENTIONAL	C6	15.7903	16.9501	14.0411	13.1276	18.3235	Died on d31pv. Acute Meningitis
CONVENTIONAL	C7	25.7351	21.6744	25.3176	17.4951	24.7338
SDPP	SDPP1	>35	>35	>35	>35	>35	Died on d35pv. Intestinal prolapse
SDPP	SDPP2	>35	>35	>35	>35	>35
SDPP	SDPP3	>35	>35	>35	>35	>35
SDPP	SDPP4	>35	>35	>35	>35	>35
SDPP	SDPP5	>35	>35	>35	>35	>35
SDPP	SDPP6	>35	>35	>35	>35	>35
SDPP	SDPP7	>35	>35	>35	>35	>35
Means CT values CONVENTIONAL		20.3324	18.9285	20.7276	18.3176	22.2571
Means CT values SDPP		>35	>35	>35	>35	>35
	P value	0.0049	0.0188	0.0231	0.0044	0.0007
Individual PCR results (CT values) on tissues of Trojans at the time of sacrifice
Treatments	Animal Id	LN submax	LN retrofar	LN Gastro-Hepat	Spreen	Tonsil	Incidences
TROJANS CONVENTIONAL	T1-C	14.0458	20.5987	25.1743	19.3936	25.6036
TROJANS CONVENTIONAL	T2-C	9.84127	9.81172	11.3176	9.92809	15.0085
TROJANS CONVENTIONAL	T3-C	6.60236	6.43958	8.73065	6.05091	7.57978
TROJANS CONVENTIONAL	T4-C	10.8209	11.2717	12.5591	9.03375	11.9487
TROJANS SDPP	T5-SDPP	10.6284	9.79029	11.11	9.35147	11.0155
TROJANS SDPP	T6-SDPP	9.96599	9.6277	10.6615	10.7707	13.5291
TROJANS SDPP	T7-SDPP	11.2849	21.8456	23.5744	16.2452	22.3071
TROJANS SDPP	T8-SDPP	11.4184	11.5206	12.0583	8.78892	15.542
Means CT values CONVENTIONAL Trojans		10.3276	12.0304	14.4454	11.1016	15.0352
Means CT values SDPP Trojans		10.8244	13.1961	14.3511	11.2891	15.5984
