# Supplementary material for: Feeding Spray-Dried Porcine Plasma to Pigs Improves the Protection Afforded by The African Swine Fever Virus (ASFV) BA71∆CD2 Vaccine Prototype Against Experimental Challenge with The Pandemic ASFV. Study 2.
Source: Preprints.org preprint supplement (doi:10.20944/preprints202301.0564.v1), 2023-01-31
Supplement: Supplementary file 5 [file Table S4- IgG values evolution over time - Study 2-V1.xlsx]

## Sheet: IgG
Table S4: Individual IgG values (OD) on serum by day
Treatment	Animal Id	0dpv	7dpv	14dpv	19dpv	25 dpv	28dpv	35 dpv	41dpv
						4dpe	7dpe	14dpe	210dpe
CONVENTIONAL	C1	0.0135	0.015	0.6215	0.8865	1.0085	1.0235	1.009	1.237
CONVENTIONAL	C2	0.0175	0.0475	0.8	1.065	1.373	1.3415	1.4205	1.4925
CONVENTIONAL	C3	0.014	0.0095	0.4085	0.6085	0.541	0.506	0.6875	1.5605
CONVENTIONAL	C4	0.018	0.034	0.5535	0.906	1.0555	1.1075	1.344	1.682
CONVENTIONAL	C5	0.018	0.016	0.4325	0.9175	1.0805	1.136	1.132	1.197
CONVENTIONAL	C6	0.021	0.0185	0.299	0.5495	0.492	0.493	Died. Acute meningitis
CONVENTIONAL	C7	0.025	0.1165	1.0605	1.26	1.365	1.368	1.445	1.4225
SDPP	SDPP1	0.017	0.0665	0.6965	0.8605	1.3075	1.204	1.49	Died. Prolapse
SDPP	SDPP2	0.0175	0.0285	0.638	0.8585	0.8285	0.826	1.1505	1.0805
SDPP	SDPP3	0.0115	0.0175	0.276	0.314	0.351	0.234	0.2225	0.2005
SDPP	SDPP4	0.0195	0.025	0.362	0.96	1.1665	1.265	1.3325	1.417
SDPP	SDPP5	0.169	0.0475	0.3345	0.5155	0.8955	0.8445	0.8955	0.81
SDPP	SDPP6	0.0125	0.022	0.493	0.809	1.147	1.273	1.2135	1.3165
SDPP	SDPP7	0.0045	0.039	0.6915	0.9105	0.998	1.0825	1.093	1.0095
SDPP	SDPP8	0.0285	0.0355	0.5075	0.9845	Died. Balance groups
Means CONVENTIONAL IgG		0.0181429	0.0367143	0.5965	0.884714	0.987929	0.9965	1.173	1.43192
Means SDPP IgG		0.035	0.0351875	0.499875	0.776562	0.956286	0.961286	1.05679	0.972333
	P value	0.4243	0.9196	0.4006	0.4017	0.8628	0.8599	0.5771	0.0392
