# Supplementary material for: Feeding Spray-Dried Porcine Plasma to Pigs Improves the Protection Afforded by The African Swine Fever Virus (ASFV) BA71∆CD2 Vaccine Prototype Against Experimental Challenge with The Pandemic ASFV. Study 2.
Source: Preprints.org preprint supplement (doi:10.20944/preprints202301.0564.v1), 2023-01-31
Supplement: Supplementary file 6 [file Table S5- IgA values evolution over time - Study 2-V1.xlsx]

## Sheet: IgA
Table S5: Individual IgA values (OD) on serum by day
Treatment	Animal Id	0dpv	7dpv	14dpv	19dpv	25 dpv	28dpv	35 dpv	41dpv
						4dpe	7dpe	14dpe	20dpe
CONVENTIONAL	C1	0.0895	0.096	0.453	0.593	0.6995	0.6725	0.629	0.9175
CONVENTIONAL	C2	0.0395	0.082	0.2095	0.225	0.379	0.38	0.4855	0.4645
CONVENTIONAL	C3	-0.0295	-0.0285	0.121	0.0175	-0.0225	0.011	0.0185	0.3405
CONVENTIONAL	C4	-0.0265	0.05	0.166	0.158	0.1695	0.1615	0.2095	0.3165
CONVENTIONAL	C5	0.128	0.1345	0.2285	0.2625	0.2185	0.2155	0.263	0.344
CONVENTIONAL	C6	0.109	0.095	0.218	0.5175	0.4685	0.4295	Died. Acute meningitis
CONVENTIONAL	C7	0.0535	0.105	0.632	0.5305	0.394	0.4325	0.4105	0.6605
SDPP	SDDP1	0.0645	0.067	0.417	0.555	0.8665	0.6655	0.945	Died. Prolapse
SDPP	SDPP2	0.0705	0.0765	0.3295	0.2525	0.25	0.2145	0.3835	0.3095
SDPP	SDPP3	-0.03	0.001	0.098	0.034	0.0195	0.0105	0.0035	0.0305
SDPP	SDPP4	-0.0395	0.0625	0.072	0.2235	0.233	0.257	0.2605	0.2735
SDPP	SDPP5	0.109	0.144	0.278	0.272	0.2845	0.251	0.266	0.2375
SDPP	SDPP6	0.0465	0.0675	0.1925	0.2275	0.7035	0.5045	0.4565	0.528
SDPP	SDPP7	0.0565	0.175	0.236	0.326	0.545	0.414	0.3235	0.35
SDPP	SDPP8	0.0045	0.304	0.316	0.493	Died. Balance groups
Means CONVENTIONAL IgA		0.0519286	0.0762857	0.289714	0.329143	0.3295	0.328929	0.336	0.50725
Means SDPP IgA		0.03525	0.112188	0.242375	0.297938	0.414571	0.331	0.376929	0.288167
	P value	0.5872	0.3861	0.5573	0.7567	0.5636	0.9865	0.7816	0.0921
