# Supplementary material for: Feeding Spray-Dried Porcine Plasma to Pigs Improves the Protection Afforded by The African Swine Fever Virus (ASFV) BA71∆CD2 Vaccine Prototype Against Experimental Challenge with The Pandemic ASFV. Study 2.
Source: Preprints.org preprint supplement (doi:10.20944/preprints202301.0564.v1), 2023-01-31
Supplement: Supplementary file 7 [file Table S6- ELISPOT values evolution over time - Study 2-V1.xlsx]

## Sheet: Elispot 
Table S6: Elispot results at different days during the study
Treatment Id	# Animal	Day 0 post-exposure (d21pv)			Day 9 post-exposure (d30pv)			Day 20 post exposure (d41pv)
		BA71ΔCD2	Georgia	Positive?	BA71ΔCD2	Georgia	Positive?	BA71ΔCD2	Georgia	Positive?
CONVENTIONAL	C1	300		Yes	47	45	Weak	125	100	Yes
CONVENTIONAL	C2	260		Yes	152	32	Yes	300	115	Yes
CONVENTIONAL	C3	100		Yes	1	1	No	50	50	Yes
CONVENTIONAL	C4	150		Yes	13	3	Weak	50	60	Yes
CONVENTIONAL	C5	300		Yes	102	56	Yes	160	130	Yes
CONVENTIONAL	C6	250		Yes	13	12	Weak
CONVENTIONAL	C7	50		Weak	8	1	Weak	15	2	Weak
SDPP	SDPP1	300		Yes	65	55	Yes
SDPP	SDPP2	300		Yes	51	42	Weak	180	140	Yes
SDPP	SDPP3	10		Weak	10	2	Weak	8	6	Weak
SDPP	SDPP4	300		Yes	118	201	Yes	300	260	Yes
SDPP	SDPP5	190		Yes	201	201	Yes	50	65	Yes
SDPP	SDPP6	10		Weak	135	100	Yes	10	7	Weak
SDPP	SDPP7	75		Yes	35	8	Weak	15	7	Weak
Average CONVENTIONAL		201.429		7/7	48	21.4286	3/7	116.667	76.1667	5/6
Average SDPP		169.286		7/7	87.8571	87	6/7	93.8333	80.8333	3/6
P value		0.625			0.255	0.07		0.733	0.921
