# Supplementary material for: Feeding Spray-Dried Porcine Plasma to Pigs Improves the Protection Afforded by The African Swine Fever Virus (ASFV) BA71∆CD2 Vaccine Prototype Against Experimental Challenge with The Pandemic ASFV. Study 2.
Source: Preprints.org preprint supplement (doi:10.20944/preprints202301.0564.v1), 2023-01-31
Supplement: Supplementary file 8 [file Table S7- Cytokines values evolution over time - Study 2-V1.xlsx]

## Sheet: Cytokines
Table S7: Individual cytokines results at different days during the study
		IFN- γ							IL-6							IFN-α							IL-1 β							IL-8 (CXCL8)							TNF-α
Treatment	Animal Id	Day of study							Day of study							Day of study							Day of study							Day of study							Day of study
		0 dpv	7 dpv	21 dpv	25 dpv	28 dpv	41 dpv		0 dpv	7 dpv	21 dpv	25 dpv	28 dpv	41 dpv		0 dpv	7 dpv	21 dpv	25 dpv	28 dpv	41 dpv		0 dpv	7 dpv	21 dpv	25 dpv	28 dpv	41 dpv		0 dpv	7 dpv	21 dpv	25 dpv	28 dpv	41 dpv		0 dpv	7 dpv	21 dpv	25 dpv	28 dpv	41 dpv
				(0 dpe)	(4 dpe)	(7 dpe)	(20 dpe)				(0 dpe)	(4 dpe)	(7 dpe)	(20 dpe)				(0 dpe)	(4 dpe)	(7 dpe)	(20 dpe)				(0 dpe)	(4 dpe)	(7 dpe)	(20 dpe)				(0 dpe)	(4 dpe)	(7 dpe)	(20 dpe)				(0 dpe)	(4 dpe)	(7 dpe)	(20 dpe)
CONVENTIONAL	C1	0	0	0	0	0	0		0	1.245	4.1	4.955	4.955	14.02		1.24	0.58	0.585	0.73	0.73	0.845		2.175	12.315	16.205	21.43	13.585	23.6		0	0	0	0	0	0		0	2.8	6.595	9.695	0	27.415
CONVENTIONAL	C2	0	0	0	0	0	0		0	0	11.745	28.02	32.94	33.92		0.39	1.01	0.68	0.79	1.02	0.905		7.03	0	7.03	11.605	3.64	11.9		0	0	0	0	0	0		5.6	0	6.595	6.445	0	16.75
CONVENTIONAL	C3	0	0	0	0	0	0		0	0	0	4.595	10.945	18.075		0.325	0.26	0	0.26	0.5	34.955		0	7.03	0	0	11.9	11.9		0	0	0	0	0	0		0	2.8	0	0	1.98	51.705
CONVENTIONAL	C4	0	0	0	3.49	1.745	1.435		0	0	0	20.07	20.085	20.085		6.155	0.7	0	1.82	0.99	8.035		2.175	3.53	0	7.07	3.64	11.605		0	0	0	0	0	11.915		2.8	0	0	43.59	22.06	43.59
CONVENTIONAL	C5	0	0	0	0	0	0		4.1	1.245	1.245	5.13	6.745	6.745		1.36	0.195	3.27	0.845	0.85	0.85		6.385	2.175	0	0.105	0.21	0		0	0	0	0	0	0		0	2.8	0	1.98	0	0
CONVENTIONAL	C7	0	0	0	0	0	0		2.855	22.74	2.49	5.68	4.595	5.68		0	0.26	0.52	0.26	0.23	2.05		2.175	7.03	5.705	0.21	0.105	0.105		0	0	0	0	0	0		0	0	0	0	0	0
SDPP	SDPP2	0	0	0	0	0	0		0	0	0	2.3	4.595	3.51		0.89	0.13	0.26	0.38	0.26	0.14		7.06	4.35	4.35	5.95	0.105	0		0	0	0	0	0	0		9.395	0	0	4.465	0	1.98
SDPP	SDPP3	0	0	0	0	0	0		14.55	66.625	46.84	99.095	106.71	159.24		0.52	1.53	0.39	0.5	0.44	2.45		8.385	11.02	8.385	13.55	13.55	8.175		0	1.165	0	0	0	0		9.395	6.595	0	3.2	1.98	4.465
SDPP	SDPP4	0	0	0	0	0	0		1.245	2.855	2.49	4.595	3.51	1.755		0.13	0.26	0.325	0.965	0.675	0.5		3.53	4.35	4.35	0	0	0		0	0	0	0	0	0		2.8	2.8	0	0	0	0
SDPP	SDPP5	0	0	0	0	0	0		0	0	0	4.595	0	1.755		1.215	0.71	0.39	0.32	0.32	0.2		22.56	7.06	5.705	14.02	3.64	0.105		15.42	0	0	0	0	0		59.115	16.515	0	8.93	1.98	1.98
SDPP	SDPP6	0	0	0	0	0	0		0	2.49	1.245	7.81	6.745	0		1.35	2.265	0.95	0.905	0.905	0.26		18.135	58.165	17.49	27.17	19.535	0.21		5.075	19.055	1.335	1.825	0	0		34.91	72.375	46.035	49	16.75	0
SDPP	SDPP7	0	0	0	7.25	0	0		0	1.245	1.245	7.81	4.595	3.51		1.125	1.185	0.765	1.135	1.02	0.615		13.625	9.71	5.705	45.725	41.375	9.485		0	0	0	4.18	2.185	0		9.92	9.395	0	70.66	27.415	0
Average CONVENTIONAL		0	0	0	0.581667	0.290833	0.239167		1.15917	4.205	3.26333	11.4083	13.3775	16.4208		1.57833	0.500833	0.8425	0.784167	0.72	7.94		3.32333	5.34667	4.82333	6.73667	5.51333	9.85167		0	0	0	0	0	1.98583		1.4	1.4	2.19833	10.285	4.00667	23.2433
Average SDPP		0	0	0	1.20833	0	0		2.6325	12.2025	8.63667	21.0342	21.0258	28.295		0.871667	1.01333	0.513333	0.700833	0.603333	0.694167		12.2158	15.7758	7.66417	17.7358	13.0342	2.99583		3.41583	3.37	0.2225	1.00083	0.364167	0		20.9225	17.9467	7.6725	22.7092	8.02083	1.40417
	P value	1	1	1	0.179	0.518	0.594		0.921	0.593	0.718	0.521	0.609	0.431		0.675	0.76	0.844	0.96	0.945	0.0013		0.125	0.078	0.605	0.065	0.187	0.226		0.033	0.035	0.876	0.487	0.798	0.182		0.0379	0.0703	0.5178	0.1591	0.6337	0.0233
		IL-12/IL-23p40							IL-17							IL-10							IL-4							TGF-β
Treatment	Animal Id	Day of study							Day of study							Day of study							Day of study							Day of study
		0 dpv	7 dpv	21 dpv	25 dpv	28 dpv	41 dpv		0 dpv	7 dpv	21 dpv	25 dpv	28 dpv	41 dpv		0 dpv	7 dpv	21 dpv	25 dpv	28 dpv	41 dpv		0 dpv	7 dpv	21 dpv	25 dpv	28 dpv	41 dpv		0 dpv	7 dpv	21 dpv	25 dpv	28 dpv	41 dpv
				(0 dpe)	(4 dpe)	(7 dpe)	(20 dpe)				(0 dpe)	(4 dpe)	(7 dpe)	(20 dpe)				(0 dpe)	(4 dpe)	(7 dpe)	(20 dpe)				(0 dpe)	(4 dpe)	(7 dpe)	(20 dpe)				(0 dpe)	(4 dpe)	(7 dpe)	(20 dpe)
CONVENTIONAL	C1	555.085	916.13	881.54	415.075	915.31	512.51		16.6885	9.6145	13.0035	3.3685	0.3113	1.835		0	17.02	34.04	11.745	8.61	10.85		0	2.235	1.68	3.065	2.155	3.325		118.605	106.295	153.9	74.725	100.41	55.935
CONVENTIONAL	C2	653.24	769.135	195.44	376.155	504.155	306.655		20.335	8.139	58.215	1.2378	9.925	9.63		0	0	3.175	2.295	0	7.72		0	0	0.5	2.785	2.99	3.66		522.75	143.7	71.1	64.925	80.07	90.825
CONVENTIONAL	C3	530.22	504.815	400.765	335.515	580.81	832.2		6.753	7.941	22.77	3.9695	1.5335	2.46		0	3.175	0	0	14.035	318.275		0	0	0	1.52	2.64	2.29		248.4	195.8	204.35	137	143.15	105.95
CONVENTIONAL	C4	889.195	715.805	427.79	552.98	652.99	656.78		6.164	6.5515	23.52	2.7615	1.231	0.3113		0	0	0	10.85	7.72	62.455		0	1.18	0	4.93	3.985	3.495		42.57	11.82	3546.5	2421.5	5007.5	1364.75
CONVENTIONAL	C5	533.08	897.42	827.105	463.34	457.5	360.06		158.9	87.885	41.525	5.461	0.9265	2.7645		3.175	3.175	10.685	7.72	4.59	0		0	0	0	0.76	2.29	0		121.695	0	181.5	89.92	116.45	177.35
CONVENTIONAL	C7	363.78	493.295	1085.09	801.345	904.105	652.975		5.024	6.5515	6.746	2.46	0	2.136		0	3.175	6.35	0	0	63.755		0	0	0.5	0.76	0.76	1.52		72.33	611.25	259.65	81.305	173.65	13.035
SDPP	SDPP2	791.635	688.68	592.48	253.845	441.715	473.115		10.6	22.24	14.255	0.3113	29.66	6.3113		0	0	0	5.425	7.02	0		0.5	0	0.5	1.145	0.76	1.715		350.3	298.15	53.475	127.9	140.45	65.61
SDPP	SDPP3	490.655	942.34	734.915	456.49	502.2	176.905		6.373	12.315	11.235	0	8.136	1.2378		6.35	10.305	0	2.295	2.295	0		0	0.5	0	0.76	1.905	1.145		348.4	191.3	120.7	94.11	114.25	32.335
SDPP	SDPP4	675.705	796.36	555.65	531.14	408.2	425.96		7.7545	6.164	6.164	0.3113	8.447	1.5423		3.175	0	3.175	7.72	10.85	0		0	0.5	0	0.76	2.29	1.905		0	62.475	76.375	149.05	23.135	66.18
SDPP	SDPP5	1216.72	1348.3	576.145	421.415	485.505	238.275		8.338	7.535	24.11	28.78	66.24	26.425		6.35	3.175	3.175	10.85	2.295	0		8.465	3.965	2.36	2.29	1.905	0.76		200.15	0	37.005	44.715	97.03	111.5
SDPP	SDPP6	673.88	1190.34	835.895	588.52	590.435	177.09		8.5435	24.625	8.743	0	5.766	5.47		0	6.35	3.175	2.295	2.295	0		5.29	17.215	7.36	6.13	3.65	1.52		75.345	81.085	36.065	56.77	60.235	130.15
SDPP	SDPP7	504.63	1909.13	713.58	850.885	930.25	1135.45		6.1675	10.39	6.753	0	4.871	0.9318		10.685	36.93	3.175	20.355	7.72	4.59		2.235	1.68	1.18	8.4	6.985	2.975		32.445	27.24	46.8	80.575	0	221.5
Average CONVENTIONAL		587.433	716.1	636.288	490.735	669.145	553.53		35.6441	21.1137	27.6299	3.20972	2.32122	3.18947		0.529167	4.42417	9.04167	5.435	5.82583	77.1758		0	0.569167	0.446667	2.30333	2.47	2.38167		187.725	178.144	736.167	478.229	936.872	301.308
Average SDPP		725.538	1145.86	668.111	517.049	559.717	437.8		7.96275	13.8782	11.8767	4.90043	20.52	6.98637		4.42667	9.46	2.11667	8.15667	5.4125	0.765		2.74833	3.97667	1.9	3.2475	2.91583	1.67		167.773	110.042	61.7367	92.1867	72.5167	104.546
	P value	0.268	0.005	0.793	0.828	0.375	0.349		0.0255	0.509	0.167	0.876	0.116	0.727		0.797	0.739	0.648	0.857	0.978	0.001		0.066	0.029	0.302	0.495	0.745	0.606		0.959	0.861	0.106	0.333	0.046	0.616
dpv : Days post vaccination
dpe: days post exposure
